# Supplementary material
Source: publisher figshare collection journal article supplement (https://acs.figshare.com/ndownloader/files/4525405)
Supplement: Supplementary file 1 [file 4525405]

## SUPPORTING INFORMATION

### **Diol-functionalized Imidazolium-based Room-temperature Ionic Liquids with Bis(trifluoromethanesulfonimide) Anions that Exhibit Variable Water Miscibility**

Andrew L. LaFrate,<sup>1</sup> Jason E. Bara,<sup>1,2</sup> Douglas L. Gin<sup>1,2\*</sup> & Richard D. Noble<sup>2\*</sup>

<sup>1</sup>Department of Chemistry & Biochemistry,

<sup>2</sup>Department of Chemical & Biological Engineering,  
University of Colorado, Boulder, CO USA 80309

\* Corresponding authors: Douglas.Gin@colorado.edu, nobler@colorado.edu

#### **General Considerations**

Unless otherwise noted, all reagents were purchased from commercial suppliers and were used without further purification, with the exception of 1-ethyl- and 1-propylimidazole, which were prepared following a literature procedure.<sup>1</sup> <sup>1</sup>H NMR spectra were recorded on a 400 MHz Varian instrument and <sup>13</sup>C NMR were recorded at 100 MHz on the same instrument. NMR spectra are reported in ppm and were referenced to the solvent peak and processed using ACD Labs 5.0 software. ESI mass spectra were recorded using the Applied Biosystems QSTAR Hybrid LC/MS/MS System mass spectrometer. K<sup>+</sup> content was determined using an Applied Research Laboratories 3410+ inductively coupled plasma-optical emission spectrometer. Cl<sup>-</sup> content was determined using a Dionex Series 4500i Ion Chromatograph. Water content was measured using a Mettler Toledo DL32 Karl Fischer Coulometer. Elemental analyses were conducted by Galbraith Laboratories (Knoxville, TN).

#### **1-(2,3-Dihydroxypropyl)-3-methylimidazolium Chloride (1)**

1-Methylimidazole (8.21 g, 100 mmol) and 3-chloro-1,2-propanediol (11.05 g, 100.0 mmol) were stirred in a 130 °C oil bath for 48 h, after which the flask was placed under vacuum and stirring continued at 130 °C for another 48 h. The residue was then dissolved in CH<sub>3</sub>OH, transferred to a tared flask and concentrated to afford the product as a viscous brown oil (19.3 g, 100%). <sup>1</sup>H NMR:  $\delta_{\text{H}}$  ppm (400 MHz; DMSO-*d*<sub>6</sub>) 3.19 - 3.29 (m, 1 H) 3.36 - 3.48 (m, 1 H) 3.77 (dd, *J*=6.78, 4.21 Hz, 1 H) 3.87 (s, 3 H) 4.10 (dd, *J*=13.74, 7.69 Hz, 1 H) 4.32 (dd, *J*=13.74, 3.11 Hz, 1 H) 5.13 (br. s., 1 H) 5.53 (d, *J*=5.13 Hz, 1 H) 7.72 (t, *J*=1.74 Hz, 1 H) 7.74 (t, *J*=1.74 Hz, 1 H) 9.18 (s, 1 H).

#### **1-(2,3-Dihydroxypropyl)-2,3-dimethylimidazolium Chloride (2)**

1,2-Dimethylimidazole (9.61 g, 100 mmol) and 3-chloro-1,2-propanediol (11.05 g, 100.0 mmol) were stirred in a 130 °C oil bath for 48 h, after which the flask was placed under vacuum and stirring continued at 130 °C for another 48 h. The product was then stirred in refluxing ether for 24 h and filtered to afford a brown solid (20.29 g, 100%). <sup>1</sup>H NMR:  $\delta_{\text{H}}$  ppm (400 MHz; DMSO-

---

1. Bara, J. E.; Lessmann, S.; Gabriel, C. J.; Hatakeyama, E. S.; Noble, R. D.; Gin, D. L. *Ind. Eng. Chem. Res.* **2007**, 46, 5397-5404.

d<sub>6</sub>) 2.60 (s, 3 H) 3.20 - 3.33 (m, 1 H) 3.36 - 3.49 (m, 2 H) 3.78 (s, 3 H) 4.08 (dd, *J*=14.11, 7.88 Hz, 1 H) 4.27 (dd, *J*=14.11, 3.11 Hz, 1 H) 5.14 (t, *J*=5.50 Hz, 1 H) 5.50 (d, *J*=5.68 Hz, 1 H) 7.63 (d, *J*=2.01 Hz, 1 H) 7.66 (d, *J*=2.20 Hz, 1 H).

### **1-(2,3-Dihydroxypropyl)-3-ethylimidazolium Chloride (3)**

1-Ethylimidazole (2.40 g, 25.0 mmol) and 3-chloro-1,2-propanediol (2.76 g, 25.0 mmol) were stirred in a 130 °C oil bath for 48 h, after which the flask was placed under vacuum and stirring continued at 130 °C for another 48 h. The residue was then dissolved in CH<sub>3</sub>OH, transferred to a tared flask and concentrated to afford the product as a viscous brown oil (4.88 g, 94%). <sup>1</sup>H NMR: δ<sub>H</sub> ppm (400 MHz; DMSO-*d*<sub>6</sub>) 1.41 (t, *J*=7.24 Hz, 3 H) 3.23 (dd, *J*=11.17, 6.96 Hz, 1 H) 3.37 - 3.47 (m, 1 H) 3.70 - 3.86 (m, 1 H) 4.11 (dd, *J*=13.74, 7.69 Hz, 1 H) 4.22 (q, *J*=7.33 Hz, 2 H) 4.33 (dd, *J*=13.74, 3.11 Hz, 1 H) 5.19 (br. s., 1 H) 5.59 (br. s., 1 H) 7.78 (t, *J*=1.74 Hz, 1 H) 7.85 (t, *J*=1.74 Hz, 1 H) 9.33 (t, *J*=1.56 Hz, 1 H).

### **1-(2,3-Dihydroxypropyl)-3-propylimidazolium Chloride (4)**

1-Propylimidazole (2.75 g, 25.0 mmol) and 3-chloro-1,2-propanediol (2.76 g, 25.0 mmol) were stirred in a 130 °C oil bath for 48 h, after which the flask was placed under vacuum and stirring continued at 130 °C for another 48 h. The residue was then dissolved in CH<sub>3</sub>OH, transferred to a tared flask and concentrated to afford the product as a viscous brown oil (5.20 g, 95%). <sup>1</sup>H NMR: δ<sub>H</sub> ppm (400 MHz; DMSO-*d*<sub>6</sub>) 0.84 (t, *J*=7.42 Hz, 3 H) 1.74 - 1.86 (m, 2 H) 3.22 (dd, *J*=11.17, 6.96 Hz, 1 H) 3.42 (dd, *J*=10.99, 4.95 Hz, 1 H) 4.07 - 4.20 (m, 3 H) 4.33 (dd, *J*=13.74, 3.11 Hz, 1 H) 5.15 (br. s., 1 H) 5.56 (br. s., 1 H) 7.78 (t, *J*=1.74 Hz, 1 H) 7.82 (t, *J*=1.83 Hz, 1 H) 9.29 (t, *J*=1.47 Hz, 1 H).

### **1-(2,3-Dihydroxypropyl)-3-butyylimidazolium Chloride (5)**

1-Butylimidazole (12.42 g, 100.0 mmol) and 3-chloro-1,2-propanediol (11.05 g, 100.0 mmol) were stirred in a 130 °C oil bath for 48 h, after which the flask was placed under vacuum and stirring continued at 130 °C for another 48 h. The residue was then dissolved in CH<sub>3</sub>OH, transferred to a tared flask, and concentrated to afford the product as a viscous brown oil (23.27 g, 92%). <sup>1</sup>H NMR: δ<sub>H</sub> ppm (400 MHz; DMSO-*d*<sub>6</sub>) 0.89 (t, 3 H) 1.17 - 1.31 (m, 2 H) 1.69 - 1.83 (m, 2 H) 3.19 - 3.28 (m, 1 H) 3.37 - 3.46 (m, 1 H) 3.78 (dd, *J*=7.05, 4.49 Hz, 1 H) 4.12 (dd, *J*=13.83, 7.60 Hz, 1 H) 4.20 (t, *J*=7.14 Hz, 2 H) 4.33 (dd, *J*=13.74, 3.11 Hz, 1 H) 5.16 (br. s., 1 H) 5.56 (d, *J*=5.31 Hz, 1 H) 7.78 (t, *J*=1.74 Hz, 1 H) 7.83 (t, *J*=1.74 Hz, 1 H) 9.30 (t, *J*=1.47 Hz, 1 H).

### **1-(2,3-Dihydroxypropyl)-3-benzylimidazolium Chloride (6)**

1-Benzylimidazole (3.95 g, 25.0 mmol) and 3-chloro-1,2-propanediol (2.76 g, 25.0 mmol) were stirred in a 130 °C oil bath for 48 h, after which the flask was placed under vacuum and stirring continued at 130 °C for another 48 h. The residue was then dissolved in CH<sub>3</sub>OH and transferred to a tared flask and concentrated to afford the product as a viscous brown oil (6.50 g, 97%). <sup>1</sup>H NMR: δ<sub>H</sub> ppm (400 MHz; DMSO-*d*<sub>6</sub>) 3.18 - 3.30 (m, 1 H) 3.37 - 3.49 (m, 1 H) 3.73 - 3.86 (m, 1 H) 4.15 (dd, *J*=13.74, 7.69 Hz, 1 H) 4.36 (dd, *J*=13.74, 3.11 Hz, 1 H) 5.21 (t, *J*=5.50 Hz, 1 H) 5.49 (s, 2 H) 5.62 (d, *J*=5.50 Hz, 1 H) 7.32 - 7.50 (m, 5 H) 7.80 (t, *J*=1.83 Hz, 1 H) 7.86 (t, *J*=1.83 Hz, 1 H) 9.49 (t, *J*=1.56 Hz, 1 H).

### **1-(2,3-Dihydroxypropyl)-3-methylimidazolium Bis(trifluoromethanesulfonimide) (7)**

1-(2,3-Dihydroxypropyl)-3-methylimidazolium chloride (**1**, 1.71 g, 8.88 mmol) and KTF<sub>2</sub>N (2.83 g, 8.88 mmol) were stirred in CH<sub>3</sub>CN (10 mL) for 24 h, then filtered through Celite and concentrated to give an orange/brown oil (3.92 g, 100%). <sup>1</sup>H NMR: δ<sub>H</sub> ppm (400 MHz; DMSO-*d*<sub>6</sub>) 3.20 - 3.30 (m, 1 H) 3.43 (dd, *J*=10.90, 4.67 Hz, 1 H) 3.77 (dd, *J*=6.69, 4.49 Hz, 1 H) 3.86 (s, 3 H) 4.06 (dd, *J*=13.74, 8.06 Hz, 1 H) 4.29 (dd, *J*=13.74, 2.93 Hz, 1 H) 4.95 (br. s., 1 H) 5.33 (d, *J*=4.95 Hz, 1 H) 7.66 - 7.69 (m, 2 H) 9.05 (s, 1 H). <sup>13</sup>C NMR: δ<sub>C</sub> ppm (100 MHz; DMSO-*d*<sub>6</sub>) 35.69, 52.17, 62.72, 119.51 (q, CF<sub>3</sub>, *J*=322.64 Hz), 123.17, 123.20, 137.09. HRMS: Calc'd for C<sub>16</sub>H<sub>26</sub>F<sub>6</sub>N<sub>5</sub>O<sub>8</sub>S<sub>2</sub> [A<sup>+</sup>][A<sup>+</sup>][B<sup>-</sup>]: 594.1127. Found: 594.1096. Elemental Analysis: Calc'd: C, 24.72%; H, 3.00%; N, 9.61%; Found: C, 24.54%; H, 2.88%; N, 9.37%. H<sub>2</sub>O content: 423 ppm.

**1-(2,3-Dihydroxypropyl)-2,3-dimethylimidazolium Bis(trifluoromethanesulfonimide) (8)**

1-(2,3-Dihydroxypropyl)-2,3-dimethylimidazolium chloride (**2**, 4.13 g, 20.0 mmol) and LiTf<sub>2</sub>N (6.32 g, 22.0 mmol) were dissolved in water (50 mL) and stirred for 24 h. The mixture was then diluted with EtOAc (100 mL) and washed with water (5 x 25 mL) until no precipitate formed in the aqueous layer upon adding AgNO<sub>3</sub>. The EtOAc layer was then dried over anhydrous MgSO<sub>4</sub>, filtered, and concentrated to give the product as an orange/brown oil (5.87 g, 64%). <sup>1</sup>H NMR: δ<sub>H</sub> ppm (400 MHz; DMSO-*d*<sub>6</sub>) 2.58 (s, 3 H) 3.29 (dd, *J*=10.99, 6.59 Hz, 1 H) 3.44 (dd, *J*=10.99, 4.95 Hz, 1 H) 3.76 (s, 4 H) 4.04 (dd, *J*=14.56, 7.60 Hz, 1 H) 4.23 (dd, *J*=14.29, 3.11 Hz, 1 H) 4.94 (br. s., 1 H) 5.23 (br. s., 1 H) 7.55 (d, *J*=2.20 Hz, 1 H) 7.59 (d, *J*=2.01 Hz, 1 H). <sup>13</sup>C NMR: δ<sub>C</sub> ppm (100 MHz; DMSO-*d*<sub>6</sub>) 9.62, 34.79, 50.95, 62.85, 70.30, 119.69 (q, CF<sub>3</sub>, *J*=317.42 Hz), 121.96, 122.14, 145.18. HRMS: Calc'd for C<sub>18</sub>H<sub>30</sub>F<sub>6</sub>N<sub>5</sub>O<sub>8</sub>S<sub>2</sub> [A<sup>+</sup>][A<sup>+</sup>][B<sup>-</sup>]: 622.1440. Found: 622.1438. Elemental Analysis: Calc'd: C, 26.61%; H, 3.35%; N, 9.31%; Found: C, 26.12%; H, 2.98%; N, 9.11%. H<sub>2</sub>O content: 443 ppm.

**1-(2,3-Dihydroxypropyl)-3-ethylimidazolium Bis(trifluoromethanesulfonimide) (9)**

1-(2,3-Dihydroxypropyl)-3-ethylimidazolium chloride (**3**, 2.85 g, 13.8 mmol) and KTF<sub>2</sub>N (4.40 g, 13.8 mmol) were stirred in CH<sub>3</sub>CN (10 mL) for 24 h, then filtered through Celite and concentrated to give an orange/brown oil (6.25 g, 100%). <sup>1</sup>H NMR: δ<sub>H</sub> ppm (400 MHz; DMSO-*d*<sub>6</sub>) 1.42 (t, *J*=7.24 Hz, 3 H) 3.26 (dd, *J*=10.90, 6.69 Hz, 1 H) 3.43 (dd, *J*=10.99, 4.95 Hz, 1 H) 3.77 (br. s., 1 H) 4.06 (dd, *J*=13.74, 8.06 Hz, 1 H) 4.21 (q, *J*=7.33 Hz, 2 H) 4.29 (dd, *J*=13.83, 3.02 Hz, 1 H) 4.95 (br. s., 1 H) 5.33 (br. s., 1 H) 7.70 (t, *J*=1.74 Hz, 1 H) 7.78 (t, *J*=1.74 Hz, 1 H) 9.12 (t, *J*=1.56 Hz, 1 H). <sup>13</sup>C NMR: δ<sub>C</sub> ppm (100 MHz; DMSO-*d*<sub>6</sub>) 15.17, 44.16, 52.27, 62.78, 69.64, 119.51 (q, CF<sub>3</sub>, *J*=321.87 Hz), 121.68, 123.33, 136.29. HRMS: Calc'd for C<sub>18</sub>H<sub>30</sub>F<sub>6</sub>N<sub>5</sub>O<sub>8</sub>S<sub>2</sub> [A<sup>+</sup>][A<sup>+</sup>][B<sup>-</sup>]: 622.1440. Found: 622.1432. Elemental Analysis: Calc'd: C, 26.61%; H, 3.35%; N, 9.31%; Found: C, 26.20%; H, 3.08%; N, 9.03%. H<sub>2</sub>O content: 452 ppm.

**1-(2,3-Dihydroxypropyl)-3-propylimidazolium Bis(trifluoromethanesulfonimide) (10)**

1-(2,3-Dihydroxypropyl)-3-propylimidazolium chloride (**4**, 3.40 g, 15.4 mmol) and LiTf<sub>2</sub>N (4.85 g, 16.9 mmol) were dissolved in water (40 mL) and stirred for 24 h. The mixture was then diluted with EtOAc (100 mL) and washed with water (5 x 25 mL) until no precipitate formed in the aqueous layer upon adding AgNO<sub>3</sub>. The EtOAc layer was then dried over anhydrous MgSO<sub>4</sub>, filtered and concentrated to give the product as an orange/brown oil (4.27 g, 60%). <sup>1</sup>H NMR: δ<sub>H</sub> ppm (400 MHz; DMSO-*d*<sub>6</sub>) 0.85 (t, *J*=7.42 Hz, 3 H) 1.71 - 1.88 (m, 2 H) 3.25 (dd, *J*=10.99, 6.78 Hz, 1 H) 3.43 (dd, *J*=10.99, 4.95 Hz, 1 H) 3.78 (br. s., 1 H) 3.99 - 4.11 (m, 1 H) 4.14 (t, *J*=7.05 Hz, 2 H) 4.30 (dd, *J*=13.83, 3.02 Hz, 1 H) 4.96 (br. s., 1 H) 5.34 (br. s., 1 H) 7.71 (t, *J*=1.74 Hz, 1 H) 7.77 (t, *J*=1.74 Hz, 1 H) 9.12 (t, *J*=1.47 Hz, 1 H). <sup>13</sup>C NMR: δ<sub>C</sub> ppm (100

MHz; DMSO-*d*<sub>6</sub>) 10.37, 22.97, 50.36, 52.32, 62.81, 69.67, 119.59 (q, CF<sub>3</sub>, *J*=322.07 Hz), 122.00, 123.43, 136.69. HRMS: Calc'd for C<sub>20</sub>H<sub>34</sub>F<sub>6</sub>N<sub>5</sub>O<sub>8</sub>S<sub>2</sub> [A<sup>+</sup>][A<sup>+</sup>][B<sup>-</sup>]: 650.1753. Found: 650.1726. Elemental Analysis: Calc'd: C, 28.39%; H, 3.68%; N, 9.03%; Found: C, 28.06%; H, 3.15%; N, 8.60%. H<sub>2</sub>O content: 459 ppm.

### **1-(2,3-Dihydroxypropyl)-3-butylimidazolium Bis(trifluoromethanesulfonimide) (11)**

1-(2,3-Dihydroxypropyl)-3-butylimidazolium chloride (**5**, 5.09 g, 20.0 mmol) and LiTf<sub>2</sub>N (6.32 g, 22.0 mmol) were dissolved in water (50 mL) and stirred for 24 h. The mixture was then diluted with EtOAc (100 mL) and washed with water (5 x 25 mL) until no precipitate formed in the aqueous layer upon adding AgNO<sub>3</sub>. The EtOAc layer was then dried over anhydrous MgSO<sub>4</sub>, filtered, and concentrated to give the product as an orange/brown oil (4.27 g, 44%). <sup>1</sup>H NMR: δ<sub>H</sub> ppm (400 MHz; DMSO-*d*<sub>6</sub>) 0.90 (t, 3 H) 1.20 - 1.32 (m, 2 H) 1.71 - 1.85 (m, 2 H) 3.20 - 3.31 (m, 1 H) 3.38 - 3.50 (m, 1 H) 3.71 - 3.85 (m, 1 H) 4.07 (dd, *J*=13.83, 7.97 Hz, 1 H) 4.18 (t, *J*=7.14 Hz, 2 H) 4.30 (dd, *J*=13.83, 3.02 Hz, 1 H) 4.95 (br. s., 1 H) 5.34 (d, *J*=5.13 Hz, 1 H) 7.70 (t, *J*=1.74 Hz, 1 H) 7.77 (t, *J*=1.74 Hz, 1 H) 9.12 (t, *J*=1.47 Hz, 1 H). <sup>13</sup>C NMR: δ<sub>C</sub> ppm (100 MHz; DMSO-*d*<sub>6</sub>) 13.28, 18.83, 31.47, 48.58, 52.29, 62.80, 69.64, 119.54 (q, CF<sub>3</sub>, *J*=322.24 Hz), 121.98, 123.39, 136.68. HRMS: Calc'd for C<sub>22</sub>H<sub>38</sub>F<sub>6</sub>N<sub>5</sub>O<sub>8</sub>S<sub>2</sub> [A<sup>+</sup>][A<sup>+</sup>][B<sup>-</sup>]: 678.2066. Found: 678.2042. Elemental Analysis: Calc'd: C, 30.06%; H, 3.99%; N, 8.76%; Found: C, 29.94%; H, 3.83%; N, 8.47%. H<sub>2</sub>O content: 379 ppm.

### **1-(2,3-Dihydroxypropyl)-3-benzylimidazolium Bis(trifluoromethanesulfonimide) (12)**

1-(2,3-Dihydroxypropyl)-3-benzylimidazolium chloride (**6**, 2.04 g, 7.60 mmol) and LiTf<sub>2</sub>N (2.40 g, 8.30 mmol) were dissolved in water (20 mL) and stirred for 24 h. The mixture was then diluted with EtOAc (100 mL) and washed with water (5 x 25 mL) until no precipitate formed in the aqueous layer upon adding AgNO<sub>3</sub>. The EtOAc layer was then dried over anhydrous MgSO<sub>4</sub>, filtered, and concentrated to give the product as an orange/brown oil (3.76 g, 95%). <sup>1</sup>H NMR: δ<sub>H</sub> ppm (400 MHz; DMSO-*d*<sub>6</sub>) 3.26 (dd, *J*=10.35, 7.05 Hz, 1 H) 3.44 (dd, *J*=10.90, 4.85 Hz, 1 H) 3.72 - 3.85 (m, 1 H) 4.10 (dd, *J*=13.92, 8.06 Hz, 1 H) 4.32 (dd, *J*=13.74, 2.93 Hz, 1 H) 4.96 (br. s., 1 H) 5.37 (d, *J*=4.95 Hz, 1 H) 5.44 (s, 2 H) 7.35 - 7.48 (m, 5 H) 7.72 (t, *J*=1.74 Hz, 1 H) 7.79 (t, *J*=1.74 Hz, 1 H) 9.26 (t, *J*=1.56 Hz, 1 H). <sup>13</sup>C NMR: δ<sub>C</sub> ppm (100 MHz; DMSO-*d*<sub>6</sub>) 51.88, 52.39, 62.80, 69.56, 119.53 (q, CF<sub>3</sub>, *J*=321.87 Hz), 122.09, 123.76, 128.22, 129.03, 134.95, 136.81. HRMS: Calc'd for C<sub>28</sub>H<sub>34</sub>F<sub>6</sub>N<sub>5</sub>O<sub>8</sub>S<sub>2</sub> [A<sup>+</sup>][A<sup>+</sup>][B<sup>-</sup>]: 746.1753. Found: 746.1760. Elemental Analysis: Calc'd: C, 34.67%; H, 3.35%; N, 8.18%; Found: C, 35.09%; H, 3.11%; N, 7.85%. H<sub>2</sub>O content: 483 ppm.

### **1,3-Bis-(2-hydroxyethyl)-imidazolium Bis(trifluoromethanesulfonimide) (13)**

1-(2-hydroxyethyl)-imidazole (5.68 g, 50.7 mmol) was dissolved in CH<sub>3</sub>CN (45 mL), then 2-bromoethanol (6.97 g, 55.8 mmol) was added and the reaction heated to reflux and stirred for 16 h. After several hours, a white precipitate formed. The flask was then cooled, the solid filtered and washed with Et<sub>2</sub>O (250 mL) and dried under vacuum to produce 10.51 g of a white powder. 10.00 g of this white powder were dissolved in deionized H<sub>2</sub>O (50 mL) and LiTf<sub>2</sub>N (13.33 g, 46.42 mmol) was added. A yellow oil immediately formed at the bottom of the flask and reaction was stirred for several hours at room temperature. The oil was taken up in EtOAc (200 mL) and washed with deionized H<sub>2</sub>O (5 x 100 mL). The fourth and fifth aqueous washings were free of halides as confirmed lack of precipitate upon addition of by addition of AgNO<sub>3</sub>. The organic phase was dried over anhydrous MgSO<sub>4</sub>, followed by addition of activated carbon. This

mixture was filtered through basic  $\text{Al}_2\text{O}_3$ , which was washed with EtOAc (100 mL). The filtrate was concentrated, and the product dried under vacuum at 65 °C overnight to produce **13** as a pale yellow, gel-like solid. (8.55 g, 46.3 %).  $^1\text{H}$  NMR:  $\delta_{\text{H}}$  ppm (400 MHz;  $\text{DMSO}-d_6$ ) 3.74 (t,  $J=4.49$  Hz, 4 H) 4.15 - 4.32 (m, 4 H) 5.17 (br. s., 2 H) 7.72 (d,  $J=1.65$  Hz, 2 H) 9.10 (s, 1 H).
